# Supplementary material for: Background color dependent photonic multilayer films for anti-counterfeiting labeling
Source: Royal Society of Chemistry journal article supplement (doi:10.1039/d1nr08482h), 2022-01-01
Supplement: d1nr08482h1.pdf [file d1nr08482h1.pdf]

## Supporting Information

Background Color Dependent Photonic Multilayer Films for Anti-counterfeiting Labeling

Jeong Min Kim, ‡<sup>a</sup> Jae Min Bak, ‡<sup>b</sup> Bogyu Lim,<sup>a</sup> Yu Jin Jung,<sup>a</sup> Byong Chon Park,<sup>c</sup> Min Ji Park,<sup>a</sup> Jong Mok Park,<sup>\*a</sup> Hyung-il Lee<sup>\*b</sup> and Seo-Hyun Jung<sup>\*a</sup>

<sup>a</sup>Center for Advanced Specialty Chemicals, Korea Research Institute of Chemical Technology (KRICT), Ulsan 44429, Republic of Korea

<sup>b</sup>Department of Chemistry, University of Ulsan, Ulsan 680-749, Republic of Korea

<sup>c</sup>Korea Research Institute of Standards and Science, Daejeon 305-340, Republic of Korea

## 1. Experimental Section

**Materials:** 2,2-Azobisisobutyronitrile (AIBN; 98%, JUNSEI) was purified by recrystallization with methanol before use, while 4-Vinylpyridine (95%, Alfar Aesar) and acryloyl chloride (96%, Merck KGaA) were utilized after purification through a basic alumina-filled column to remove inhibitors. 2-Vinylnaphthalene (95%, Sigma-Aldrich), 4-hydroxybenzophenone (98%, Alfar Aesar), triethylamine (TEA, 99%, Tokyo Chemical Industry Co., Ltd.; TCI), 1,4-dioxane (99%, Sigma-Aldrich), N,N-dimethylformamide (DMF, 99.9%, SAMCHUN), and 1-chloropropane (98%, Sigma-Aldrich) were used as received. P(2VN-co-BPA) and P4QP-51% were prepared as reported previously.

**Instrumentation:** <sup>1</sup>H NMR spectroscopy was conducted with an Avance III HD 300 MHz (Bruker). Apparent molecular weights were measured by gel permeation chromatography (GPC) (1260 Infinity, Agilent) using a polystyrene standard with DMF eluent at 30 °C and a 1 mL/min flow rate. The refractive index of each polymer was measured by ellipsometry (HORIBA Scientific., UVISEL). Lamellae were viewed using transmission electron microscopy (TEM) prepared from the polymer-laminated sample using a focused ion beam (FIB) method. To reduce the FIB damage, the outermost layer of the polymer laminate was pre-coated with successive layers of sputtered-platinum, carbon (permanent marker deposition), and ion-beam deposited platinum before FIB milling. The ion-beam deposition and milling were performed with an FEI Helios Nanolab FIB system (Thermo Scientific). Cross-sectional images of the polymer laminates were then acquired from the lamellae via scanning-TEM (STEM) (bright field, four-channel-STEM; GEMINISEM 500, ZEISS) at a 30 kV acceleration voltage (200 kV failed to produce enough contrast difference between the two alternating polymer films in the laminate). Spectral reflectance was observed using a UV-vis spectrometer (USB4000, OceanOptics Inc.). Digital photographs of the 1D PC films were acquired using a Canon EOS RP.

**Fabrication of the 1D PC film (F1):** F1 film samples were prepared as follows: 1.5 wt% (P4QP-51%) was dissolved in 1-propanol, and 2.5 wt% P(2VN-co-BPA) in chlorobenzene, and passed through a 0.45  $\mu\text{m}$  PTFE syringe filter before spin-coating. Next, the two polymer solutions were alternatively spin-coated onto a PET film at 2300 rpm for 12 s. The film was then dried for 2 min to eliminate the solvent, followed by exposure to a UVA lamp (652  $\text{mJ}/\text{cm}^2$ ) after each spin-coated layer was applied. This process was repeated to generate overall 10 layers.

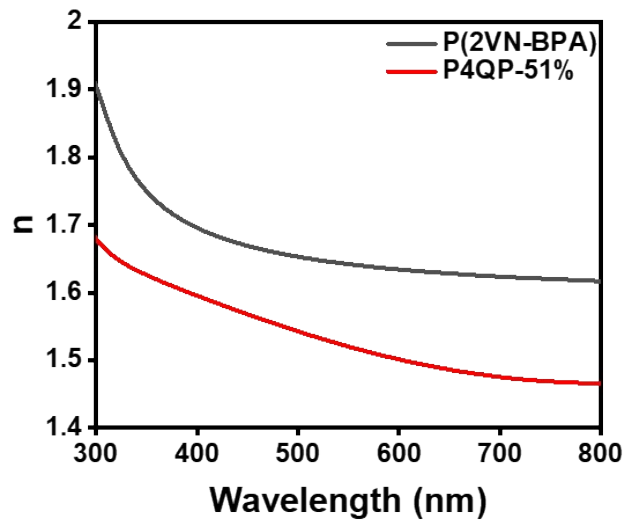

| Polymers   | Refractive index |
|------------|------------------|
| P(2VN-BPA) | 1.630            |
| P4QP-51%   | 1.491            |

**Figure S1.** The refractive indices of single layers of each polymer analyzed by ellipsometer.
